# Supplementary material for: The Apis mellifera Filamentous Virus Genome
Source: MDPI journal article supplement (doi:10.3390/v7072798), 2015-07-09
Supplement: s1 [file s1]

**Figure S1.** Alignments of sequences obtained from Swiss and US AmFV isolates. The following genes were used for designing diagnostic PCR assays: AmFV\_112 (*Bro* gene), AmFV\_28 (thymidylate synthase gene) and AmFV\_221 (ribonucleotide reductase gene). Primers positions are underlined in bold characters.

## 1. AmFV\_112 (Bro gene)

CLUSTAL 2.1 Multiple Sequence Alignments

Sequence type explicitly set to DNA  
Sequence format is Pearson  
Sequence 1: AmFV\_112 1497 bp  
Sequence 2: US 1497 bp  
Start of Pairwise alignments  
Aligning...

Sequences (1:2) Aligned. Score: 98.33  
Guide tree file created: [clustalw.dnd]

There are 1 groups  
Start of Multiple Alignment

Aligning...  
Group 1: Sequences: 2 Score:28110  
Alignment Score 10157

CLUSTAL 2.1 multiple sequence alignment

```
AmFV_112_CH_      ATGGATTCAAAGGTTTATACCTATGAAGATCAAGAGGTTACTGTACTTAGTTGTTTAGAC
US_BRO            ATGGAGTCAAAGGTTTATACCTATGAAGATCAAGAGGTTACTGTACTTAGTTGTTTAGAC
*****

AmFV_112_CH_      GAAAACAATGTACGTTTTTATTATCTAATAACGTTTCTTGCTATTTTTGGTCTAAAAAAC
US_BRO            GAAAACAATGTACGTTTTTATTATCTAATAACGTTTCTTGCTATTTTTGGTCTAAAAAAC
*****

AmFV_112_CH_      CGACGTTTCGTACATAAGAACACGCTTACAAAATCTGCAAAAACCGCAAAGATATTTCTT
US_BRO            CAACGTTTCGTACATAAGAACACGCTTACAAAATCTGCAAAAACCGCAAAGATATTTCTT
* *****

AmFV_112_CH_      CGATATCTATCCGAATTTAATGTATCGAGCGTCTTACCCAGAGAATTCGGTTTTTGTGAGT
US_BRO            CGATATCTATCTGAATTCATGTATCGAGTGTCTTACCAGAGAATTCGGTTTTTGTGAGT
*****

AmFV_112_CH_      GCTGCTGGATTAAAAGAAATTATATCAAAGTTACAACATGAGAAAAACATTTTTGGATT
US_BRO            GCTGCCGGATTAAGAGAAATTATATCAAAGTTACAACATGAGAAAAAAATTTATTTGATT
*****

AmFV_112_CH_      ACCTTGTTGAAGAGAATTTTTCGTGATTATAAAGAAAGTAGTTGGTCAAACAAAAACGAC
US_BRO            ACCTTTTGAAGAGGATTTTTCGTGATTATAAAGAAAGTAGTTGGTCAAACAAAAACGAC
*****

AmFV_112_CH_      ATTTTAATGAAAAAGGTAACCTTTTGAAGGATATTCTTTTGACTTGGTGAAGATAATTGGT
US_BRO            ATTTTAATGAAAAAGGTAACCTTTTGAAGGATATTCTTTTGACTTGGTGAAGATAATTGGT
*****

AmFV_112_CH_      GATGACGATGATTATTTTACGCTAAACCACTCGAAAAAATTTTGAATTACAAGAAGCTA
US_BRO            GATGACGATGATTATTTTACGCTAAACCACTCGAAAAAATTTTGAATTACAAGAAGCTA
*****
```

|                        |                                                                                                                                                |
|------------------------|------------------------------------------------------------------------------------------------------------------------------------------------|
| AmFV_112_CH_<br>US_BRO | CATAAAGCTATACGAAAGTACGTTTCGCCGAACAATTGTCGTCCATTTAGTTCGTTCGCAC<br>CATAAAGCTATACAAAAGTACGTTTCGCCGAACAATTGTCGTCCATTTAGTTCGTTCGCAC<br>*****        |
| AmFV_112_CH_<br>US_BRO | ATAGGGGTTATATACACAGGAAAAACAACATCGTTGCCATATCTCAAACCGAATGCAAAC<br>ATAGGGGTTATATACACAGGAAAAACGACATCGTTGCCATATCTCAAACCGAATGCAAAC<br>*****          |
| AmFV_112_CH_<br>US_BRO | TTTATTAAACACCGCAGGCTTCAACGAATTAATTTTGCATTGACCCAACCTTTTGCGAAG<br>TTTATTAAACACCGCAGGCTTCAACGAATTAATTTTGCATTGACCCAACCTTTTGCGAAG<br>*****          |
| AmFV_112_CH_<br>US_BRO | CGTTTCAAGGAATGGCTGATCAACGTTATGGATCAATTGCGAGTGGACGGCGAGTACGTG<br>CGTTTCAAGGAATGGCTGATCAACGTTATGGATCAATTGCGAGTGGACGGCGAGTACGTG<br>*****          |
| AmFV_112_CH_<br>US_BRO | GTTACCCGAGACGCCCATTTGGACATCC <u>AGCAAGACTTGGCCACCATGA</u> ACAACATCTTT<br>GTTACCCGAGACGCCCATTTGGACATCCAGCAAGACTTGGCCACCATGAACAACATCTTT<br>***** |
| AmFV_112_CH_<br>US_BRO | GGACAGACACCTCGGACACCTCGATTAGCTGTTCAACCTCTTCAGACGAAACCTCTGGAT<br>GGACAGACACCTCGGACACCTCGATTAGCTGTTCAACCTCTTCAGACGAAACCTCTGGAT<br>*****          |
| AmFV_112_CH_<br>US_BRO | CAGTTGACTCTATCGGAGTGTCACGACTTGATAATGTTCTTACAAAGAGAAAAACAACCTTA<br>CAGTTGACTCTATCGGAGTGTCACGACTTGATAATGTTCTTACAAAGAGAAAAACAACCTTA<br>*****      |
| AmFV_112_CH_<br>US_BRO | TACAAACGGAACATACAGAGATATCAAGTCCAACCTACGCCAACGTGTCACTCATCCGGCA<br>TACAAACGGAACATACAGAGATATCAAGTCCAACCTACGCCAACGTGTCACTCATCCGGCA<br>*****        |
| AmFV_112_CH_<br>US_BRO | GACTACAGTCTCTTCATGTTGCTGTGCGATGAGTGTTGTCCGATCCGTCATTTCGGTTCTCC<br>GACTACAGTCTCTTCATGTTGCTGTGCGATGAGTGTTGTCCGATCCGTCATTTCGGTTCTCC<br>*****      |
| AmFV_112_CH_<br>US_BRO | ATCTCGAGAGGAAAGGACAAGTATATTCGTAGTATCGAGGCAAAACGTAGGAAATTTGTC<br>ATCTCGAGAGGAAAGGACAAGTATATTCGTAGTATCGAGGCAAAACGTAGGAAATTTGTC<br>*****          |
| AmFV_112_CH_<br>US_BRO | GCCGCTTGCAAGCAAGACCGGTCTCTGCTGTCTTCCCCGCAAGCCGCGCGGTATCTGCAG<br>GCCGCTTGCAAGCAAGACCGGTCTCTGCTGTCTTCCCCGCAAGCCGCGCGGTATCTGCAG<br>*****          |
| AmFV_112_CH_<br>US_BRO | ATTACCATCAAAAAGTACAGAACCGCCAACGCGGCGATCTCGTGGATGCGGATTTCGTAAA<br>ATTACCATCAAAAAGTACAGAACCGCCAACGCGGCGATCTCGTGGATGCGGATTTCGTAAA<br>*****        |
| AmFV_112_CH_<br>US_BRO | GAGTATATAAACTTTTTGGACGACGTGGACTTTACGAATCGTTGCAAGACCGTTTTTTTCG<br>GAGTATATGAACTTTTTGGACGACGTGGACTTTACGAATCGTTGCAAGACCGTTTTTTTCG<br>*****        |
| AmFV_112_CH_<br>US_BRO | CCACGAGGTTTACGGCCCGCATCGATGGATCCCCTCTTCTCCGATCGGCTGGACGCACAT<br>CCACGAGGTTTACGGCCCGCATCGATGGATCCCCTCTTCTCCGATCGGCTGGACGCACAT<br>*****          |
| AmFV_112_CH_<br>US_BRO | GACGACCGTGACTCTTTAGAGTGGCTGGACCCCAAAATAGCCGACTTCAAGGGCACGGTC<br>GACGACCGTGACTCTTTAGAGTGGCTGGACCCCAAAATAGCCGACTTCAAGGGCACGGTC<br>*****          |
| AmFV_112_CH_<br>US_BRO | GAGCGTATGTGCGACAGAGTGTTTCGAAAGGCTCGATCGGGAGACCAACTTGACGACTAAC<br>GAGCGTATGTGCGACAGAGTGTTTCGAAAGGCTCGAGCGGGAGACCAACTTGACGACTAAC<br>*****        |
| AmFV_112_CH_<br>US_BRO | TCGGCAAGAATAGAGGACGATCCGAGCAAGCCTGGACCGTCTAATGCGGTTGAGTAA<br>TCGGCAAGAATAGAGGACGATCCGAGCAAGCCTGGGCGGTCTAATGCGGTTGAGTAA<br>*****                |

## 2. AmFV\_28 (thymidylate synthase gene)

### CLUSTAL 2.1 Multiple Sequence Alignments

Sequence type explicitly set to DNA  
Sequence format is Pearson  
Sequence 1: AmFV\_28 1833 bp  
Sequence 2: US\_TS 1833 bp  
Start of Pairwise alignments  
Aligning...

Sequences (1:2) Aligned. Score: 98.9634  
Guide tree file created: [clustalw.dnd]

There are 1 groups  
Start of Multiple Alignment

Aligning...  
Group 1: Sequences: 2 Score: 34599  
Alignment Score 13792

CLUSTAL-Alignment file created [clustalw.aln]

---

clustalw.aln

### CLUSTAL 2.1 multiple sequence alignment

```
AmFV_28      ATGAGTGCATCGAATCCTATTGAGATCAACTCTATCACTCAAACGAACGGGAATGCGGAA
US_TS        ATGAGTGCATCGAATCCTATTGAGATCAACTCGATCACTCAAACGAACGGGAATGCGGAA
*****

AmFV_28      CATCTTATTGATGACACTTACGGCCGGAACGAGACGCCTAACACCGGCGACACAGCACAA
US_TS        CATCTTATTGATGACACTTACGGCCGGAACGAGACGCCTAACACCGGCGACACAGCACAA
*****

AmFV_28      CTCGTGCGCATCGCCAGACACGCCAAAAACGACAGAACTCCAGAAGTAGAAACGGCAACA
US_TS        CTCGTGCGCATCGCCAGACACGCCAAAAACGACAGAACTCCAGAAGTAGAAACGGCAACA
*****

AmFV_28      ACGCCCGCCCAAATCAACACAGCCATCAATCGACCAACGAACGTAAGCCCTCAACATCCG
US_TS        ACGCCCGTCCAAATCAACACAGCCATCAATCGACCAACGAACGTAAGCCCTCAACATCCG
*****

AmFV_28      CCAAACCGCCACGAAAGTCGATCGTGAATCCTCCGACTACTCCAAACGAAACACAAAAC
US_TS        CCAAACCGCCACGAAAGTCGATCGTGAATCCTCCGACTACTCCAAACGAAACACAAAAC
*****

AmFV_28      GACCAACTAAGAACCTCACGCACCGACCAACCAAAACGCCAACCAACCGCCAATTAAGC
US_TS        GACCAACTAAGAACCTCACACACCGACCAACCAAAACGCCAACCAACCGCCAATTAAGC
*****

AmFV_28      AAATTAAGCAACCCGCAGAGAGGTCCAAACTCCCCAAACCATCCACCAAGCGACTTTGTC
US_TS        AAATTAAGCAACCCGCAGAGAGGTCCAAACTCCCCAAACCGTCCACCAAGCGACTTTGTC
*****

AmFV_28      AGAAACTCCTCCTCGAACAACTCGAACTGCTCACCACAAACAACTCTAAACGCGGGGTC
US_TS        AGAAACTCCTCCTCGAACAACTCGAACTGCTCACCACAAACAACTCTAAACGCGAGGTC
*****

AmFV_28      ACCACCAACTGGAACCACGCATTACCCTACGCTCCAGGCCACACACACAACAGAACAACG
US_TS        ACCACCAACTGGAACCACGCATTACCCTACGCTCCAGGTCACACACACAACAGAACAACG
```

```

*****

AmFV_28      AACCACCTCGTTGAACAACAAGTGGGACGAGTGGAACCGCGAACTCAGTCGAATCGAGAGA
US_TS        AACCACCTCGTTGAACAACAAGTGGGACGAGTGGAACCGCGAACTCAGTCGAATCGAGAGA
*****

AmFV_28      CGCGTACAAACGATCAACGAGACCTTCAAAAACATTGGTGAGATGAGCACGGAACCAAGT
US_TS        CGCGTACAAACGATCAACGAGACCTTCAAGAACATTGGTGAGATGAGCACGGAACCAAGT
*****

AmFV_28      GAAACTGAAAACCCCAATCAAAGTACCAGCGTAGCGAGCATCAACAATCTTGTCAC TGAC
US_TS        GAAACTGAAAACCCCAATCAAAGTACCAGCGTAGCGAGCATCAACAATCTTGTCAC TGAC
*****

AmFV_28      ATCGACAGCGACATTATGGGCAACACATCCATCGACGCAACCGAAAAGGCGAGACTCCTC
US_TS        ATCGACAGCGACATTATGGGCAACACATCCATCGACGCAACCGAAAAGGCAAGACTCCTC
*****

AmFV_28      GCGATGATCGCCTCCACACCGGGACTGGAGAACGACGAGCCGGACAACGTCAACGTGAAC
US_TS        GCGATGATCGCCTCCACACCGGGACTGGAGAACGACGAGCCGGACAACGTCAACGTGGAC
*****

AmFV_28      GAGGTGAAAAACCTTCCCGATGTTTCGATCCGACAACCGATACCACAACGATGCTCAAACC
US_TS        GAGGTGAAAAACCTTCCCGATGTTTCGATCCGACAACCGATACCACAACGATGCTAAAACC
*****

AmFV_28      GATACTATCGACCGATTTCGGTCTGACCGACCCGCAGTTTCGACGACACATGGAACGACCGC
US_TS        GATACTATCGACCGATTTCGGTCTGACCGACCCGCAGTTTCGACGACACATGGAACGACCGC
*****

AmFV_28      ATGTACCAACAACCTCGTACGAAAAGTACTGAAACGAGGCGAACAACGGGACGACCGCACG
US_TS        ATGTACCAACAACCTCGTACGAAAAGTACTGAAACGAGGCGAACAACGGGACGACCGCACG
*****

AmFV_28      GGCACGGGAACTCGCGCCCTGTTCGGCGAGCTGCTCGAATTTGATCTTCGAGGTAATCGG
US_TS        GGCACGGGAACTCGCGCCCTGTTCGGCGAGCTGCTCGAATTTGATCTTCGAGGTAATCGG
*****

AmFV_28      CTGCCATTGCTCAACTGCCGCCGCTCTCGTTCAAGTCCATTCTCGAGGAAGTCTGTGG
US_TS        CTGCCATTGCTCAACTGCCGCCGCTCTCGTTCAAGTCCATTCTCGAGGAAGTCTGTGG
*****

AmFV_28      TTCTTGCGCGGGGAGACCGACAGCAAAATACTGGAACGCCGAGGTGTACATATCTGGACC
US_TS        TTCTTGCGCGGGGAGACCGACAGCAAAATACTGGAACGCCGAGGTGTACATATCTGGACC
*****

AmFV_28      GAACATGCGACCCGAGACGTCTTGACGAAAAGAGGCTTTCCATCGCGGCGGGAAGGCGAC
US_TS        GAACATGCGACCCGAGACGTACTGACGAAAAGAGGCTTTCCATCGCGGCGGGAAGGCGAC
*****

AmFV_28      ATCGGACCGCTCTACGGATTCCAATGGCGGTTTCGCCGACTGCGCTACACCAACTGTGAA
US_TS        ATCGGACCGCTCTACGGATTCCAATGGCGGTTTCGCCGACTGCGCTACACCAACTGTGAA
*****

AmFV_28      GCCAACTATGCGGCCCAAAAACGAACGAGAGGGTATGACCAAATCGCTTACATTTTAGAC
US_TS        GCCAACTATGCGGCCCAAAAACGAACGAGAGGGTACGACCAAATCGCTTACATTTTAGAC
*****

AmFV_28      GAACTGACTGCTCGTCCACACAGTCGTCTGTTGCTCAACTCGTGGAATGTAGCCGAC
US_TS        GAACTGACTGCTCGTCCACACAGTCGTCTGTTGCTCAACTCCTGGAATGTAGCCGAC
*****

AmFV_28      ATCGCCGAAATGGTGTTGCCGCCCTTGTCACGTTATGTTTCAACTCTTTGCCGACAATGCT
US_TS        ATCGCCGAAATGGTGTTGCCGCCCTTGTCACGTCATGTTTCAACTCTTTGCCGACAATGCT
*****

AmFV_28      AACGAACTGTCAGGAATGCTGTACTCGCGCAGCGCAGACATCGGTCTTGTTTACCGTTC
US_TS        AACGAACTGTCAGGAATGCTGTACTCGCGCAGCGCGGACATCGGTCTTGTTTACCGTTC
*****

```

|         |                                                              |
|---------|--------------------------------------------------------------|
| AmFV_28 | AATATTGCGTCCTACGCCATCTTGCTACACGCCATAGCCAAAAAAGTGGGTCGAACAGCC |
| US_TS   | AATATTGCGTCCTACGCCATCTTGCTACACGCCATAGCCAAAAAAGTGGGTCGAACAGCC |
|         | *****                                                        |
| AmFV_28 | AAAACGTTGAAGGTGATCATCGGTGATGCCCACATCTACAACGACCACATCGACGCAATG |
| US_TS   | AAAACGTTGAAGGTGATCATCGGTGATGCCCACATCTACAACGACCACATCGACGCAATG |
|         | *****                                                        |
| AmFV_28 | ACCGAGATTGCGGCTCGCGAACCACGACCATCACCACGCGTTTACATCGACAGCAGGTCG |
| US_TS   | ACCGAGATTGCGGCTCGCGAACCACGACCATCACCACGCGTTTACATCGACAGCAGGTCG |
|         | *****                                                        |
| AmFV_28 | TTCGACAAACCGCTCCACGAATACTCGACCGACTTTTTCCACCTGTTCAACTACCACCCA |
| US_TS   | TTCGACAAACCGCTCCACGAATACTCGACCGACTTTTTCCACCTGTTCAACTACCACCCA |
|         | *****                                                        |
| AmFV_28 | CACGAACCCGTTTCGTATGCGCGTGTCGGTATAG                           |
| US_TS   | CACGAACCCGTTTCGTATGCGCGTGTCGGTATAG                           |
|         | *****                                                        |

### 3. AmFV\_221 (ribonucleotide reductase gene)

#### CLUSTAL 2.1 Multiple Sequence Alignments

Sequence type explicitly set to DNA  
Sequence format is Pearson  
Sequence 1: AmFV\_221 2649 bp  
Sequence 2: US\_RR 2634 bp  
Start of Pairwise alignments  
Aligning...

Sequences (1:2) Aligned. Score: 98.4055  
Guide tree file created: [clustalw.dnd]

There are 1 groups  
Start of Multiple Alignment

Aligning...  
Group 1: Sequences: 2 Score:49515  
Alignment Score 19334

CLUSTAL-Alignment file created [clustalw.aln]

---

clustalw.aln

#### CLUSTAL 2.1 multiple sequence alignment

```
AmFV_221      ATGAGCTTGCCCGCGATAATTGATCAGAGTATTGCGGGCGCTCAGAGCATTCGAGGTGAA
US_RR         ATGAGCTTGCCCGCGATAATTGATCAAAGTATTGCGGGTGTTCAGAGCATTCGAGGTGAA
*****
AmFV_221      CAAACGACGAATCTTGACAGCGACATTAAGGAAGCTTCCTCAGACTCGCAAGACACCGAT
US_RR         CAAACGACGAATCTTGACAGCGACATTAAGGAAGATTCTCAGACTCGCAAGACACCGAT
*****
AmFV_221      TCCACAGTCGTTCCCATCTACCCGCACCACTTGGCTTTGCCGACGAGTCCGAGATAGCA
US_RR         TCCACAGTCGTTCCCATCTACCCGCACCACTTGGCTTTGCCGACGAGTCCGAGATAGCA
*****
AmFV_221      GAACCGACTATCGAGCCAACTACCACACCGACCGCCGATCTTACCACCGTTGAGCCTACC
US_RR         GAACCGACTATCGAGCCAACTACCACACCGACCGCCGAGCTTACCACCGTTGAGCCTACC
*****
AmFV_221      GCTGAGCTCACCGTTGAGCCTACCGCTGAGCTTACCGCTGAGCTTACCGCTGATCCGACC
US_RR         GCTGAGCTCACCGTTGAGCCTACCGCTGAGCTTACCG-----CTGATCCGACC
*****
AmFV_221      GGAGCCGAACCTCGAACCGATCGTGGATCTACCCAAAGTCCCGATCGAAGAACCAGCAGTG
US_RR         AGAGCCGAACCTCGAACCGATCGTGGATCTACCCAAATCCCGATCGAAGAACCAGCAGTG
*****
AmFV_221      GTAGTGTGCGACGACACATACAAACACGTACACCGAAACCAACGATTTCGACGGATGAC
US_RR         GTAGTGTGCGACGACACATACCAACACGTACACCGAAACCAACGATTTCGACGGATGAC
*****
AmFV_221      GATTTTCCCGATTTTGCGGACTTTCGTGGCGCTAGTATCGTCGATCGTTCCGAATCTCCC
US_RR         GATTTTCCCGATTTTGCGGACTTTCGTGGCGCTAGTATCGTCGATCGTTCCGAATCTCCC
*****
AmFV_221      CGACCTGGGGGAACACCGCCCGCCGCCTATATAGAGCGCTCGTCCTCACCAGTGATACAGA
```

|                   |                                                                                                                                                   |
|-------------------|---------------------------------------------------------------------------------------------------------------------------------------------------|
| US_RR             | CGACCTGGGGGAACACCGCCGCCGGCCTATATAGAGCGCTCGTCCTCACCGGTGTACAGA<br>*****                                                                             |
| AmFV_221<br>US_RR | ACCTTACCTTCTGTGTATACGGACGATTTCGACCAACGACGTTTCGATCTACGAAGGAATA<br>ATCCTACCTTCTGTGTATACGGACGATTTCGACCAACGACGTTTCGATCTACGAAGGAATA<br>* *****         |
| AmFV_221<br>US_RR | ACACGTTTCGGTGAATCGATCGTCTCGGTTGACACAAGCTCCACCGATCCGACAAAACCG<br>ACACGTTTCGGTGAATCGATCGTCTCGGTTGACACAAGCTCCACCGATCCGACAAAACCG<br>*****             |
| AmFV_221<br>US_RR | CTCAACTTTGCCGAAGTGTGGCGCGACAGCATAACATACACCACTGTTACCTCGTCTGATC<br>CTCAACTTTGCCGAAGTGTGGCGCGACAGCATAACATACACCGCTGTTACCTCGTCTGATC<br>*****           |
| AmFV_221<br>US_RR | CGGAATCAACGATTTCGCAACACCGACTTTTACAACGTTTAAACCTATGGAGGCACAACGT<br>CGGAATCAACGATTTCGCAACACCGACTTTTACAACGTTTAAACCTATGGAGGCACAACGT<br>*****           |
| AmFV_221<br>US_RR | CCCTTACGCAAATCACCACAAATAAATTTACTCGAATCGATTGCAAAAGACTCGTCGGAC<br>CCCTTACGCAAATCACCACAAATAAATTTACTCGAATCGATTGCAAAAGACTCGTCGGAC<br>*****             |
| AmFV_221<br>US_RR | GAACACTCTAGCGACGAGAGTGAGATCGTCTCACCGACCATGGTGTCTCGACCCGTTTCGT<br>GAACACTCTAGCGACGAGAGTGAGATCGTCTCACCGACCATGGTGTCTCGACCCGTTTCGT<br>*****           |
| AmFV_221<br>US_RR | CACGTTTCGCTTCAACTTGAAAGACGACGACTCCGAGTCGGAGCATTCTACTGAGATGGTC<br>CACGTTTCGCTTCAACTTGAAAGACGACGACTCCGAGTCGGAGCATTCTACTGAAATGGTC<br>*****           |
| AmFV_221<br>US_RR | GAGATCTCGGTAAAGACCGAGAGAGAAGAGTCTGCTGACGACTCGGTGGCGGAATCGATC<br>GAGATCTCGGTAAAGACCGAGAGAGAAGAGTCTGCTGACGACTCGGCGGCGGAATCGAAC<br>*****             |
| AmFV_221<br>US_RR | GACTCCGAAGAAAACGTACCGTGGCGACAGGAAGGGAGCACGCTGGTCTTGCAAATACCG<br>GACTCCGAAGAAAACGTACCGTGGCGACAGGAAGGGAGCACGTTGGTCTTGCAAATACCG<br>*****             |
| AmFV_221<br>US_RR | GACCACATTATGGCTCGTCTCTACCGACCGAAGAAACAAAAACAGAAACAAAAACAGAAG<br>GACCACATTATGGCTCGTCTCTACCGACCGAAGAAACAAAAACAGAAACAAAAACAGAAG<br>*****             |
| AmFV_221<br>US_RR | CAAAACCCGCAGAACAAAGCTAAACCAGCAGAACAAAGCCAAACAGCAGAACAAAGCTTGGT<br>CAAAACCCGCAGAACAAAGCTAAACCAGCAGAACAAAGCTAAACCAGCAGAACAAAGCTTGGT<br>*****        |
| AmFV_221<br>US_RR | CAGCAGAACAGACCTGTACCACAGTTCGATTTCGAGTGATCAAAACGATCGAAATGATTCA<br>CAGCAGAACAGACCCGTACCACAGTTCGATTTCGAGTGATCAAAACGATCGAAATGATTCA<br>*****           |
| AmFV_221<br>US_RR | ACGGCTTTAGAGGACAAAGACGAGTCGAAACCGGGCTCGATGAGCTCGACAAGCTCACAA<br>ACGGCTTTAGAGGACAAAGACGAGTCGAAACCGTGCTCGA---GCTCGACAAGCTCACAA<br>*****             |
| AmFV_221<br>US_RR | AAATCTACCGTGCGTACTCGAGCCACGTGGAGCAAACCCGAACGGCCTATTGTGCTGTCA<br>AAATCTACCGTGCGTACTCGAGCCACATGGAGCAAACCCGAACGGCCTATTGTGCTGTCA<br>*****             |
| AmFV_221<br>US_RR | GTGCCGCCGCTGAGCCACCCATTGACTACTCTGATAGTAGCGACGACGATGACGATGTA<br>GTGCCGCCGCTGAGCCACCCATTGACTACTCTGATAGTAGCGACGACGATGACGATGTA<br>*****               |
| AmFV_221<br>US_RR | GTGGTGTGTTGACCACAATTTCGAAGAGCGGAAGTCTGATCGAGATCGCCCCGCTTTGTTCGCG<br>GTGGTGTGTTGACCACAATTTCGAAGAGCGGAAGTCTGATCGAGATCGCCCCGCTTTGTTCGCG<br>*****     |
| AmFV_221<br>US_RR | <u>CGATCCTGCCCCGACGTTCTTCGAAACACGATCACGAGTCGAGCAACTCTGAATCGTCT</u><br><u>CGATCCTGCCCCGACGTTCTTCGAAACACGATCACGAGTCGAGCGACTCTGAATCGTCT</u><br>***** |

|                   |                                                                                                                                             |
|-------------------|---------------------------------------------------------------------------------------------------------------------------------------------|
| AmFV_221<br>US_RR | CACGTTAATCGCATACCCGAGCGCGAGATCGAGAAGGTTACGCGGTTTTGCGATCGTGTT<br>CACGTTAATCGCATACCCGAGCGCGAGATCGAGAAGGTTACGCGGTTACTGCGATCGTGTT<br>*****      |
| AmFV_221<br>US_RR | CCTGAGCGAACCTCTTTTGAATGGAACCGTCGCCGCTAGTGGAACCGCTGCTCGACGCC<br>CCTGAGCGAACCTCTTTTGAATGGAACCGTCGCCGCTAGTGGAACCGCTGCTCGACGCC<br>*****         |
| AmFV_221<br>US_RR | ACTAAAGATGAGGAGCGGTTTCGTCTTGTTCCTCCGTTTCAGCATCCCGACATCTACGACATG<br>ACTAAAGATGAGGAGCGGTTTCGTCTTGTTCCTCCGTTTCAGCATCCCGACATCTACGACATG<br>***** |
| AmFV_221<br>US_RR | TACAAACGACAAGTGGCCAGTTTTGGACCATGGAGGAGATTGATCTCTCCAAGGACTTG<br>TACAAACGACAAGTGGCCAGTTTTGGACCATGGAGGAGATTGATCTCTCCAAGGACTTG<br>*****         |
| AmFV_221<br>US_RR | GCCGATTGGAACGAACGACTATCTAGCCATGAACGCGATTCTTCAAATGCATCTTGGCC<br>GCCGATTGGAACGAACGACTATCTAGCCATGAACGCGACTTCTTCAAATGCATCTTGGCC<br>*****        |
| AmFV_221<br>US_RR | TTCTTTGCACCGAGCGACGGTATCGTCGGTGAGAATCTGGTGACGCGTTTCTACGAAATG<br>TTCTTTGCACCAAGCGACGGTATCGTCGGTGAGAATCTGGTGACGCGTTTCTACGAGATG<br>*****       |
| AmFV_221<br>US_RR | GT <u>AGTGTAACCGAGGCCGCT</u> ACTTCTACGCGTTCCAAGCCGCAATGGAGAACATTAC<br>GTAGTGTAACCGAGGCCGCTACTTCTACGCGTTCCAAGCCGCAATGGAGAACATTAC<br>*****    |
| AmFV_221<br>US_RR | GCCGAGGTCTACAGTCAGTTGATCAAGACACTAATTCGAACGAAGACGAACAGCGGTCC<br>GCCGAGGTCTACAGTCAGTTGATCAAGACACTAATTCGAACGAAGACGAACAGCGGTCC<br>*****         |
| AmFV_221<br>US_RR | ATCTTCTCATCGTTCATGACCACGCCAGGCATCACTGAAAAGACTCGCTGGGCAAAACAG<br>ATCTTCTCATCGTTCATGACCACGCCAGGCATCACTGAAAAGACTCGCTGGGCAAAACAG<br>*****       |
| AmFV_221<br>US_RR | TGGCTCGAACGAGAAAAATCTCAGCTTCGTCGAGCGACTAGTCGCTTTTGCTGTGGTCGAA<br>TGGCTCGAACGAGAAAAATCTCAGCTTCGTCGAGCGACTAGTCGCTTTTGCTGTGGTCGAA<br>*****     |
| AmFV_221<br>US_RR | GGACTGTTGTTTAGCGGCAGCTTTCCTCCATCTTCTGGTTGAAAAAGCGTGGACTTATG<br>GGACTGTTGTTTAGCGGCAGCTTTCCTCCATCTTCTGGTTGAAAAAGCGTGGACTTATG<br>*****         |
| AmFV_221<br>US_RR | CACGGTCTGACCTTTAGTAACGAACGATCAGTCGGGACGAGGGTTGCATTGCGACTTC<br>CACGGTCTGACCTTTAGTAACGAACGATCAGTCGGGACGAGGGTTGCATTGCGACTTC<br>*****           |
| AmFV_221<br>US_RR | GCCTGTCTTCTCTACACCAACACATCGTGACAAGCTGCCCAACAATGTGATCTACAAC<br>GCCTGTCTTCTCTACACCAACACATCGTGACAAGCTGCCCAACAATGTGATCTACAAC<br>*****           |
| AmFV_221<br>US_RR | ATCGTACGTGAAGCCGTACATGCTGAGTCCATATTCTTTGGTCATGCACTCCGAAATGGA<br>ATCGTACGTGAAGCCGTACATGCTGAGTCCATCTTCTTTGGTCATGCACTCCGAAACGGA<br>*****       |
| AmFV_221<br>US_RR | CCGGTCGGTGAGCTCAGCCAACACAACATGATGCAGTATGTTTCGCTTTTGCGCGGACCGT<br>CCGGTCGGTGAGCTCAGCCAACACAACATGATGCAGTATGTTTCGCTTTTGCGCGGACCGT<br>*****     |
| AmFV_221<br>US_RR | TTGCTCACGGCCCTTGATGTGCCACCTCTGTACTCGGCCACCAATCCGTTTCGATTTTCATG<br>TTGCTCACGGCCCTTGATGTGCCACCTCTGTATTCGGCCACCAATCCGTTTCGATTTTCATG<br>*****   |
| AmFV_221<br>US_RR | CACATGATCTCGTTGGATGGGAGAACCAACTTCTTTGAACGGCGCGTCGGCGAGTACCGA<br>CACATGATCTCGTTGGATGGGAGAACCAACTTCTTTGAACGGCGCGTCGGCGAGTACCGA<br>*****       |
| AmFV_221          | CAGAGTCGTGTTCTAACCGCAAACGAACGCGAGTACGACGAGTCGTTTGGTCTTGACTAC                                                                                |



US\_RR

CAGAGTCGTGTTCTAACCGCAAACGAACGCGAGTACGACGAGTCGTTTGGTCTTGACTAC  
\*\*\*\*\*

AmFV\_221

GATTTTTAG

US\_RR

GATTTTTAG  
\*\*\*\*\*
